# Supplementary material for: Exploration of icariin analog structure space reveals key features driving potent inhibition of human phosphodiesterase-5
Source: PubMed Central journal article supplement (PMC6754136; doi:10.1371/journal.pone.0222803), 2019-09-20
Supplement: pone.0222803.s001.pdf [file pone.0222803.s001.pdf]

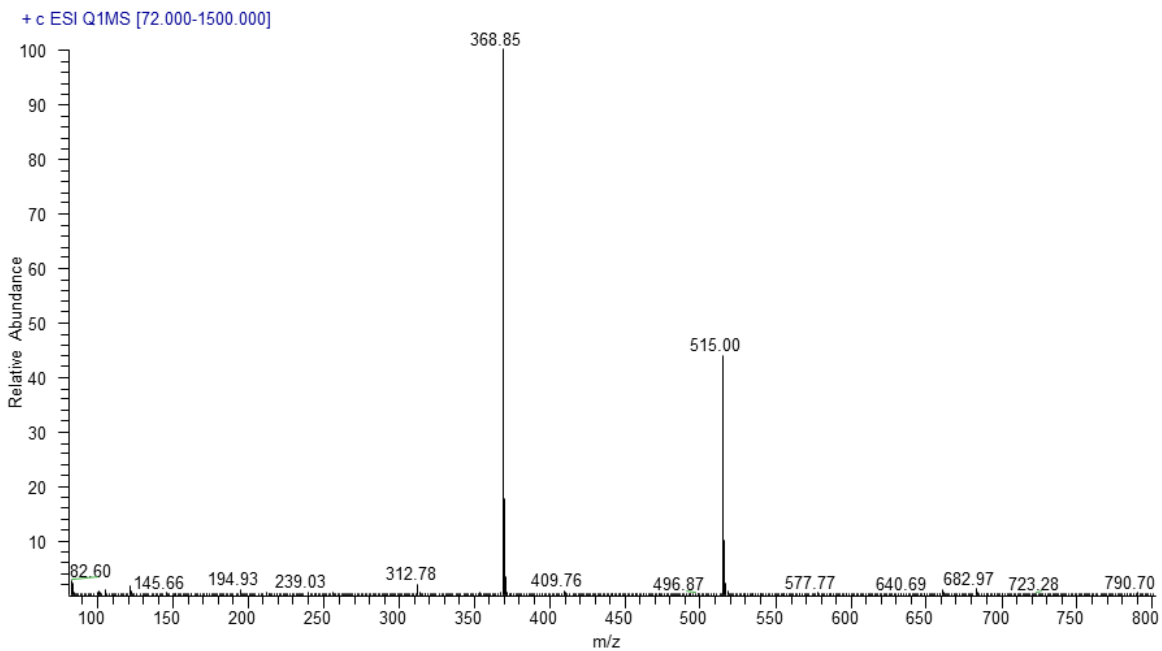

**S1-A Fig. Characterization of compound 1, MS/MS spectrum of compound 1.**

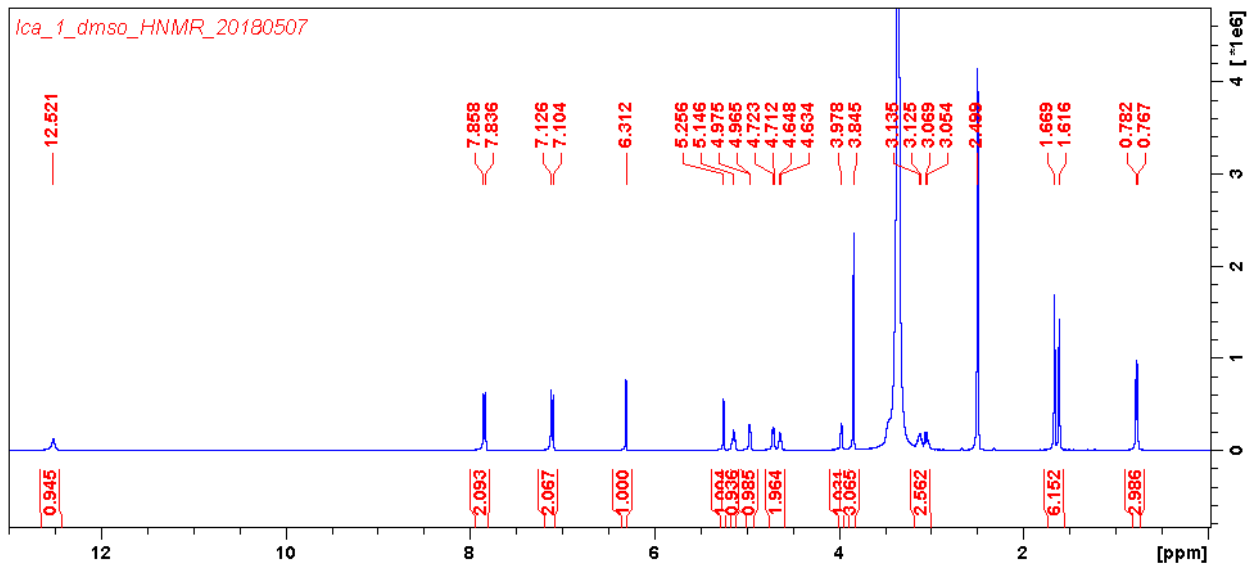

**S1-B Fig. Characterization of compound 1, <sup>1</sup>H NMR (400 MHz, DMSO-d<sub>6</sub>) spectrum of compound 1.**

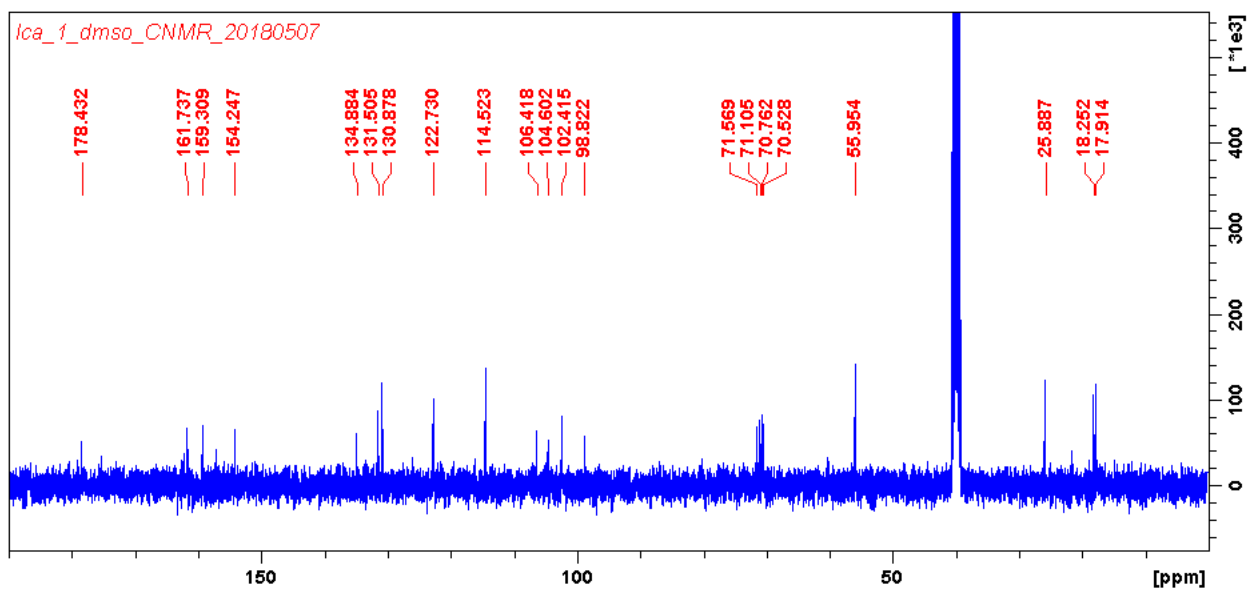

**S1-C Fig. Characterization of compound 1,**  $^{13}\text{C}$  NMR (100 MHz,  $\text{DMSO-}d_6$ ) spectrum of compound 1.
