# Supplementary material for: Exploration of icariin analog structure space reveals key features driving potent inhibition of human phosphodiesterase-5
Source: PubMed Central journal article supplement (PMC6754136; doi:10.1371/journal.pone.0222803), 2019-09-20
Supplement: pone.0222803.s003.pdf [file pone.0222803.s003.pdf]

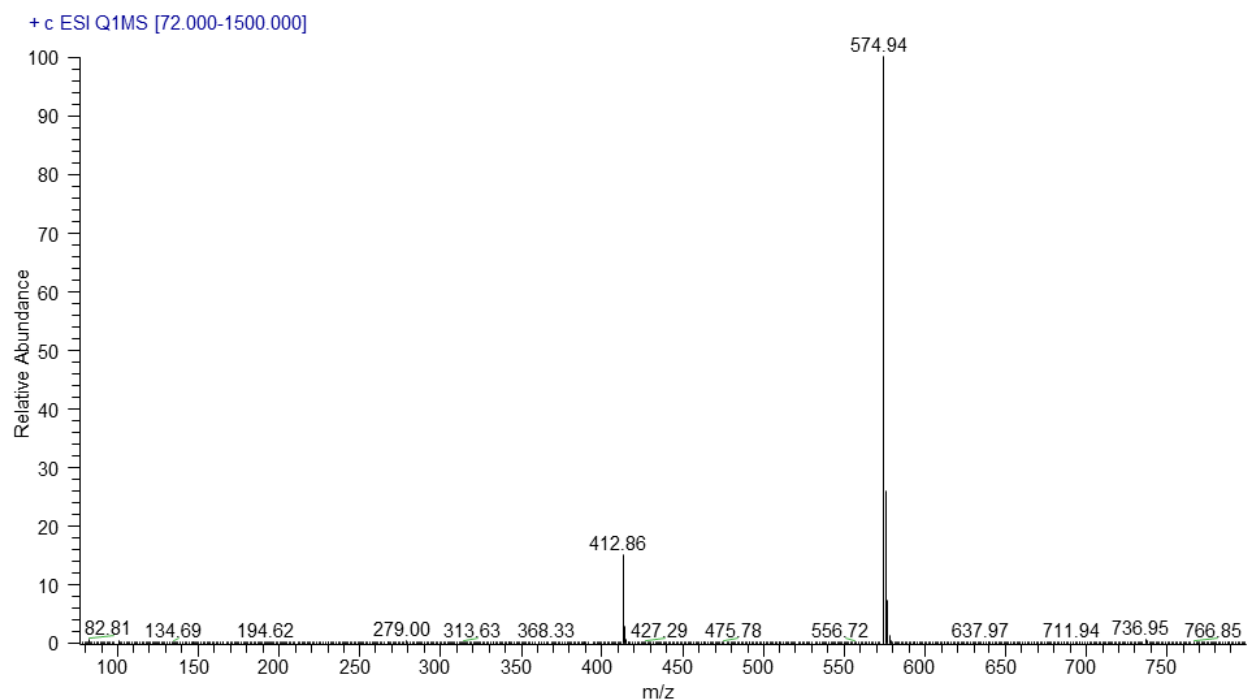

**S3-A Fig. Characterization of compound 3, MS/MS spectrum of compound 3.**

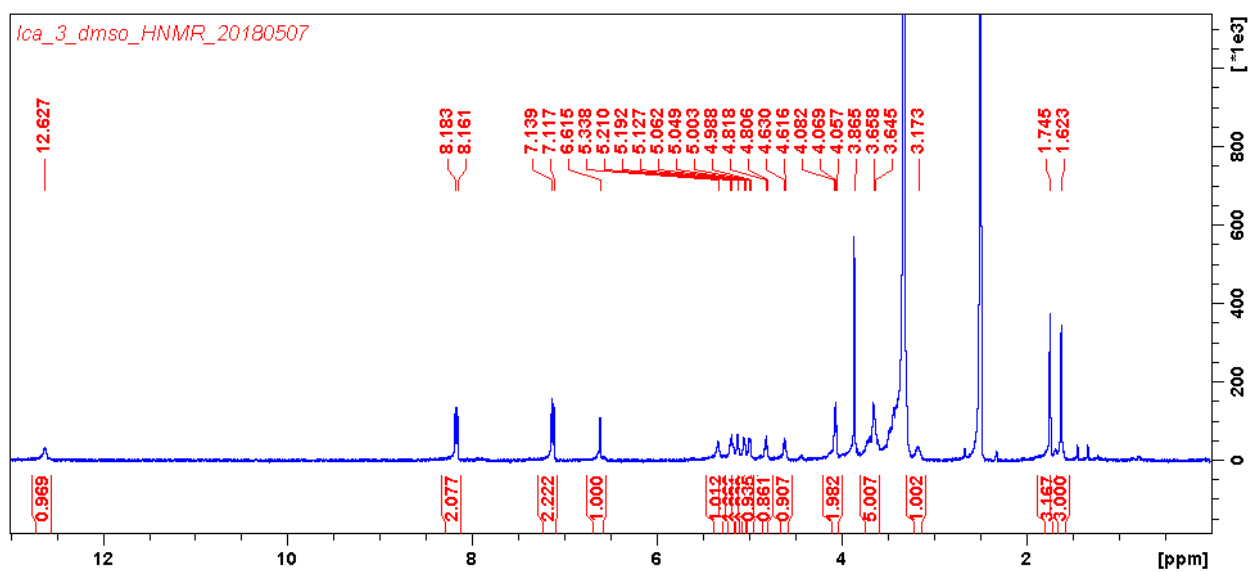

**S3-B Fig. Characterization of compound 3, <sup>1</sup>H NMR (400 MHz, DMSO-*d*<sub>6</sub>) spectrum of compound 3.**

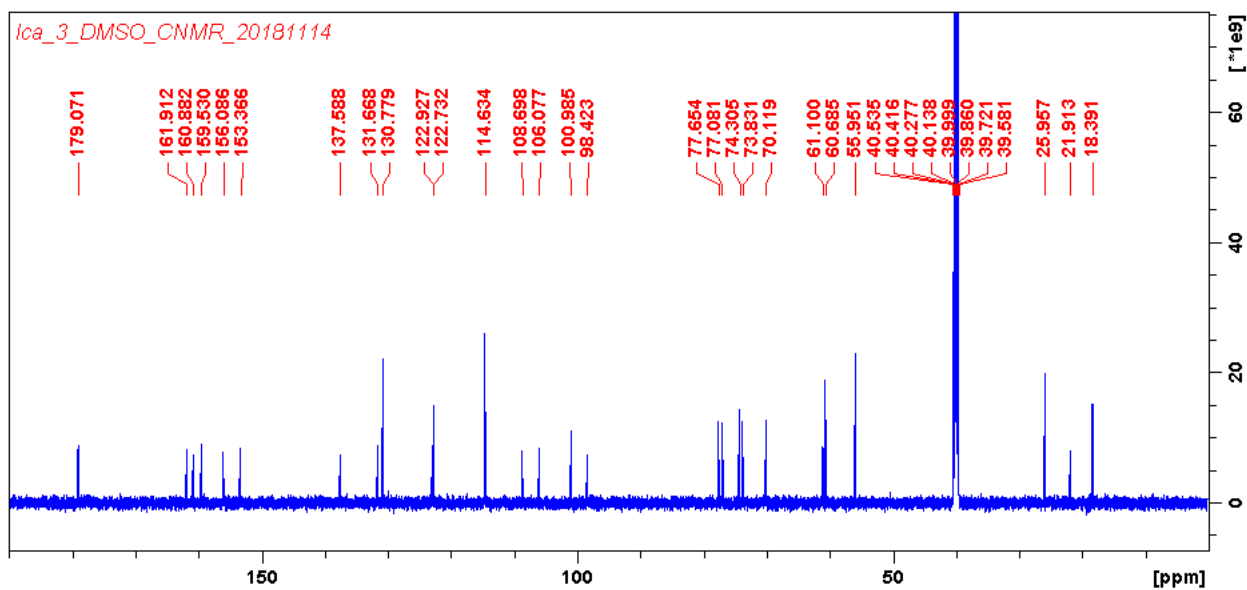

**S3-C Fig. Characterization of compound 3,**  $^{13}\text{C}$  NMR (100 MHz,  $\text{DMSO-}d_6$ ) spectrum of compound 3.
