# Supplementary material for: Exploration of icariin analog structure space reveals key features driving potent inhibition of human phosphodiesterase-5
Source: PubMed Central journal article supplement (PMC6754136; doi:10.1371/journal.pone.0222803), 2019-09-20
Supplement: pone.0222803.s005.pdf [file pone.0222803.s005.pdf]

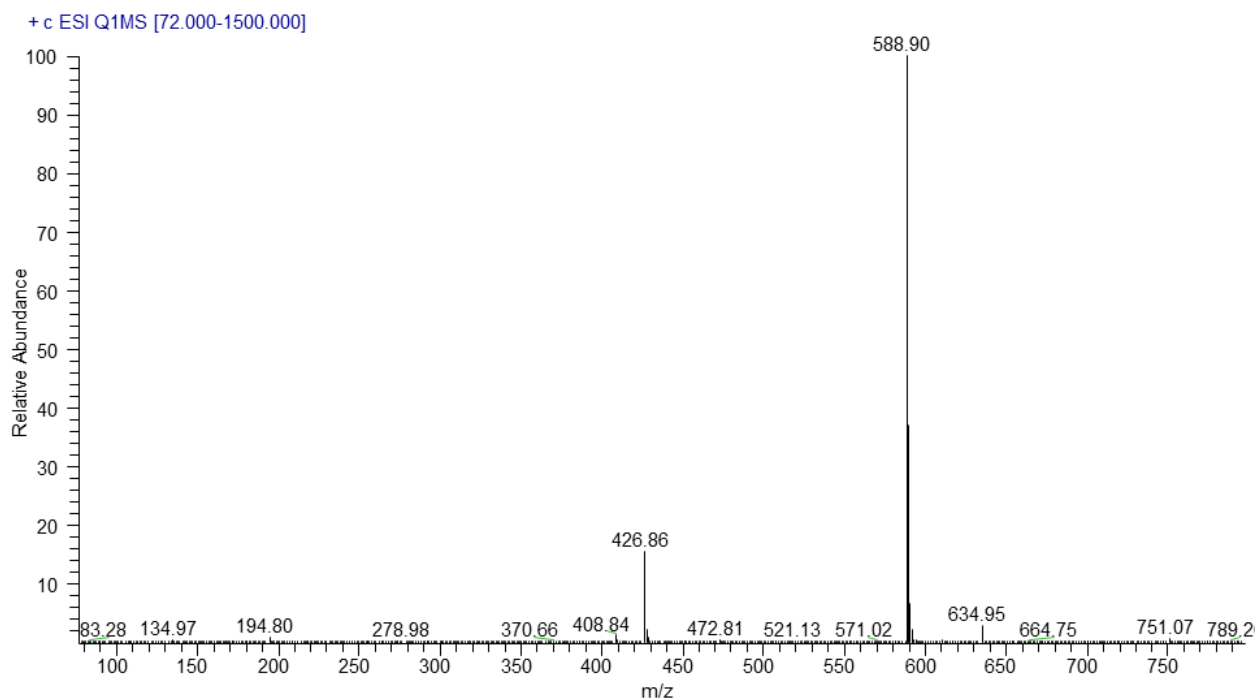

**S5-A Fig. Characterization of compound 5, MS/MS spectrum of compound 5.**

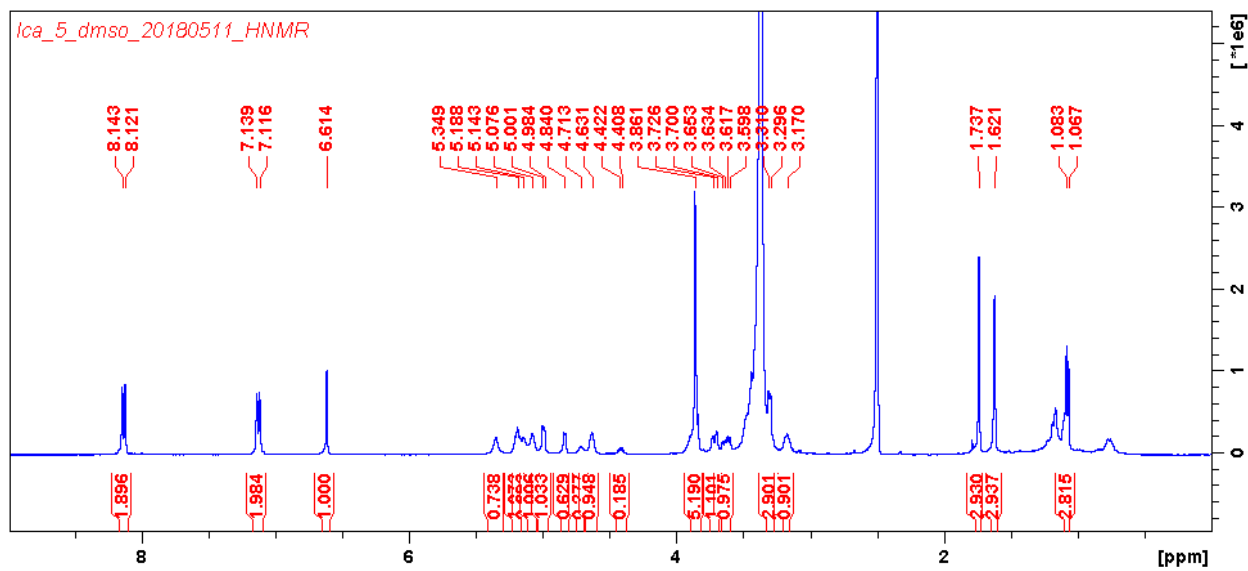

**S5-B Fig. Characterization of compound 5,  $^1\text{H}$  NMR (400 MHz,  $\text{DMSO-}d_6$ ) spectrum of compound 5.**
