# Supplementary material for: Exploration of icariin analog structure space reveals key features driving potent inhibition of human phosphodiesterase-5
Source: PubMed Central journal article supplement (PMC6754136; doi:10.1371/journal.pone.0222803), 2019-09-20
Supplement: pone.0222803.s008.pdf [file pone.0222803.s008.pdf]

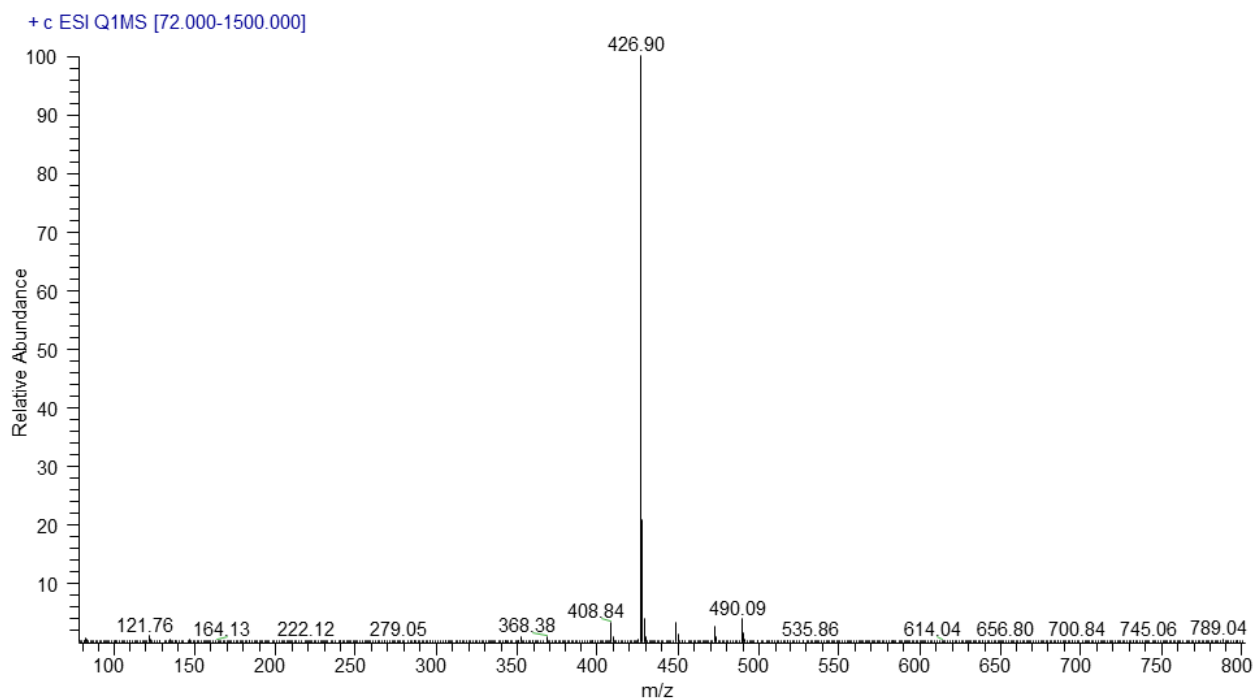

**S8-A Fig. Characterization of compound 8, MS/MS spectrum of compound 8.**

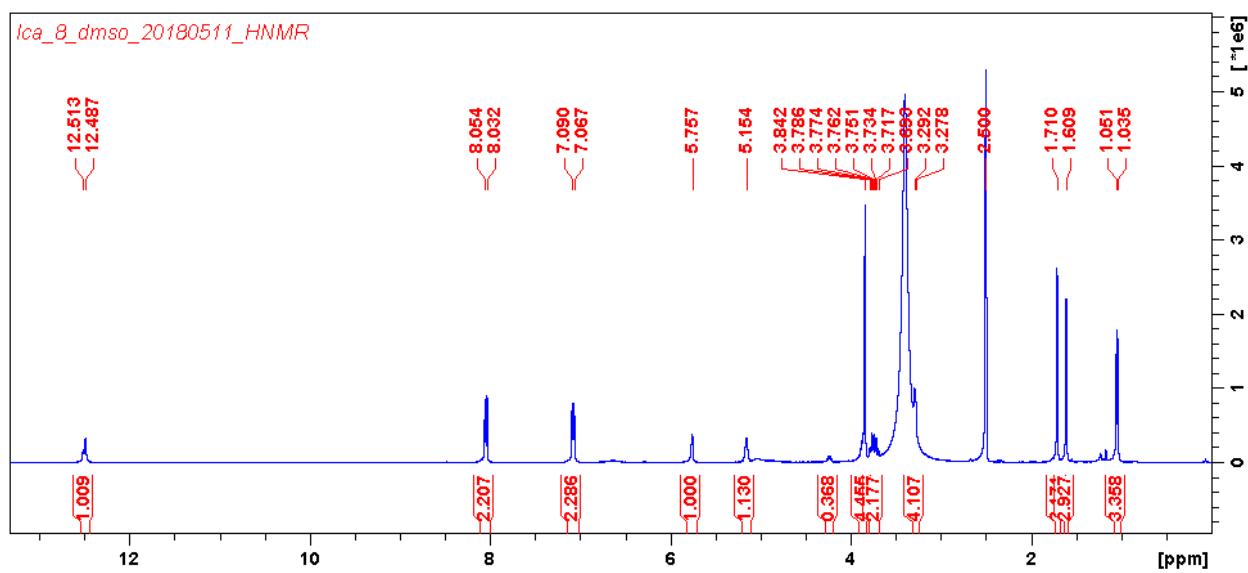

**S8-B Fig. Characterization of compound 8,  $^1\text{H}$  NMR (400 MHz,  $\text{DMSO-}d_6$ ) spectrum of compound 8.**
