# Supplementary material for: Exploration of icariin analog structure space reveals key features driving potent inhibition of human phosphodiesterase-5
Source: PubMed Central journal article supplement (PMC6754136; doi:10.1371/journal.pone.0222803), 2019-09-20
Supplement: pone.0222803.s013.pdf [file pone.0222803.s013.pdf]

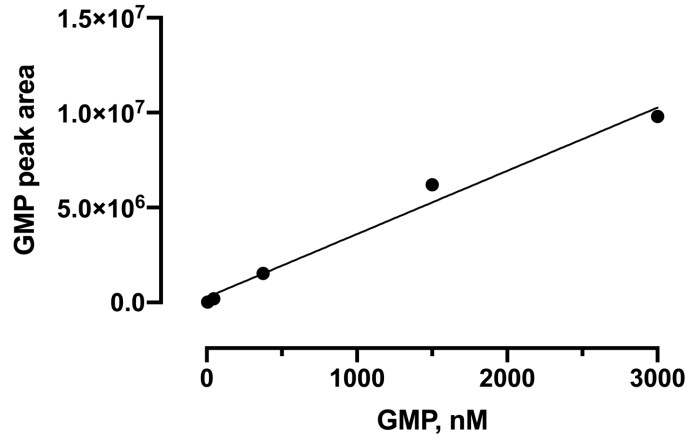

**S13Fig. A representative GMP calibration curve measured using HPLC-UV-MS as described in the Methods section. GMP standard concentrations used were 5.9, 47, 375, 1500, and 3000 nM.**
