# Supplementary material for: Exploration of icariin analog structure space reveals key features driving potent inhibition of human phosphodiesterase-5
Source: PubMed Central journal article supplement (PMC6754136; doi:10.1371/journal.pone.0222803), 2019-09-20
Supplement: pone.0222803.s014.pdf [file pone.0222803.s014.pdf]

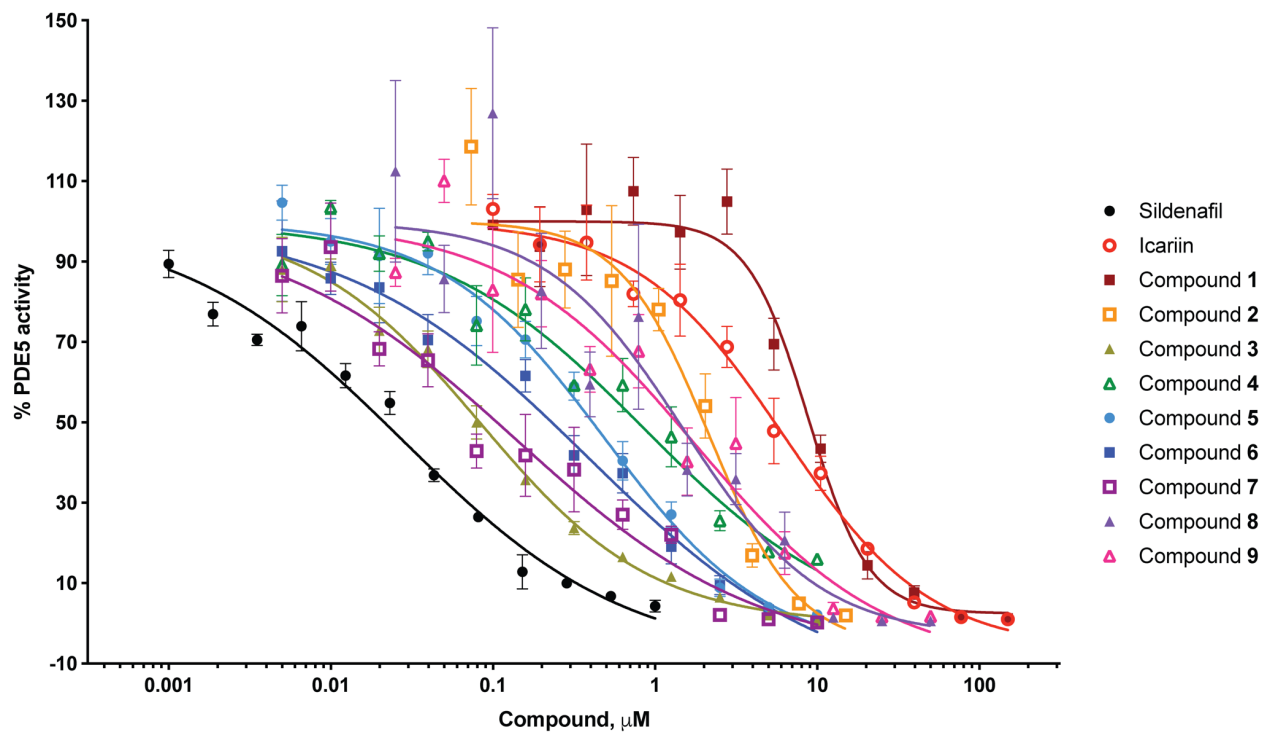

**S14 Fig. Dose-response curve and best-fit line as determined by nonlinear regression analysis for each icariin analog and sildenafil in *in vitro* PDE5 inhibition assays.** Each data point represents the mean (from at least three replicates)  $\pm$  SEM. Solid lines represent the best-fit line as determined by nonlinear regression analysis.
