# Supplementary material for: Exploration of icariin analog structure space reveals key features driving potent inhibition of human phosphodiesterase-5
Source: PubMed Central journal article supplement (PMC6754136; doi:10.1371/journal.pone.0222803), 2019-09-20
Supplement: pone.0222803.s015.pdf [file pone.0222803.s015.pdf]

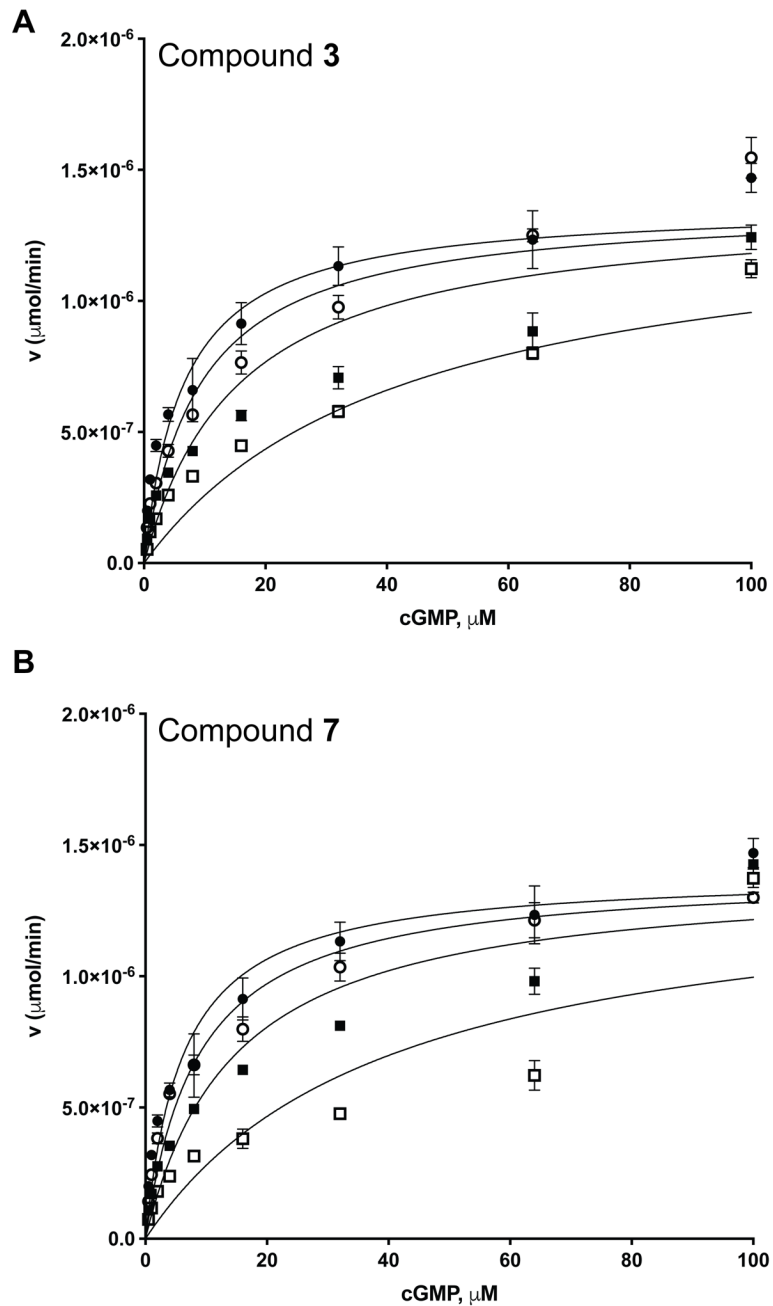

**S15 Fig. Original, untransformed Michaelis-Menten plots for PDE5 kinetics assays in the presence of compound 3 (A) or 7 (B).** ● is no inhibitor, ○ is 0.015  $\mu\text{M}$  inhibitor, ■ is 0.05  $\mu\text{M}$  inhibitor, and □ is 0.2  $\mu\text{M}$  inhibitor. Each data point represents the mean (from at least three replicates)  $\pm$  SEM. Solid lines represent the best-fit line as determined by nonlinear regression analysis for a competitive inhibition model.
