# Supplementary material for: Exploration of icariin analog structure space reveals key features driving potent inhibition of human phosphodiesterase-5
Source: PubMed Central journal article supplement (PMC6754136; doi:10.1371/journal.pone.0222803), 2019-09-20
Supplement: pone.0222803.s016.pdf [file pone.0222803.s016.pdf]

**S1 Table. PDE5 residues within hydrogen-bonding distance (<3.5Å) to the icariin analog 7-O or 3-O functional group in ligand docking simulations**

|                  | 7-O position                                    | 3-O position           |
|------------------|-------------------------------------------------|------------------------|
| Icariin          | Ser668 (x2), Arg667, Ser668, Glu669, Leu804(x2) | His613                 |
| 1 (icariside II) | Ser668                                          | Asp764, His613         |
| 2 <sup>a</sup>   |                                                 |                        |
| 3                | Ile665, Arg667, Ser668 (x2), Glu669, Leu804     | Asp764                 |
| 4                | Ser668, Ile665, Arg667, Phe820 (main chain)     | Leu725                 |
| 5                | Ser668 (x3), Leu804                             | Asp764, Leu765         |
| 6                | Ser668                                          | Asp764                 |
| 7                | Ser668                                          | Asp764, Thr723, Leu725 |
| 8                | Ser668                                          | His613                 |
| 9                | Ser668                                          |                        |

<sup>a</sup>A reasonable model could not be determined
